# Supplementary material for: High-Fat Diet Enhances the Liver Metastasis Potential of Colorectal Cancer through Microbiota Dysbiosis
Source: MDPI journal article supplement (doi:10.3390/cancers14112573), 2022-05-24
Supplement: s1 [file s1]

Rats:

Table S1 | Primers used for the quantitative real-time PCR.

|               |                                                                 |
|---------------|-----------------------------------------------------------------|
| TNF- $\alpha$ | F:5' CCACGCTCTTCTGTCTACTG 3'<br>R:5' GCTACGGGCTTGTCACTC 3'      |
| IL-1 $\beta$  | F:5' TGTGATGTTCCCATTAGAC 3'<br>R:5' AATACCACTTGTTGGCTTA 3'      |
| OCLN          | F: 5' GTTACTGGCAGAACTCG 3'<br>R: 5' ATAGTCTCCCACCATCCT 3'       |
| ZO-1          | F: 5' GATGAGCGGGCTACCTTA 3'<br>R: 5' ATGGGAGCGAACTGAATG 3'      |
| MMP2          | F: 5' CTGGGCAACAAGTATGAGA 3'<br>R: 5' GCTGCCACAAGGAATAGG 3'     |
| MMP9          | F: 5' GACAGCTCCTCCCCTATGT 3'<br>R: 5' TCAGCAATGGCATCAAAA 3'     |
| CXCL12        | F:5' GCATCAGTGACGGTAAGC 3'<br>R:5' AGGGCACAGTTTGGAGTGTTGAGGA 3' |
| TLR4          | F:5'TGCTGCCAACATCATCCA3'<br>R: 5'GAGCGGCTACTCAGAACTGCCATG3'     |
| IL-6          | F: 5' GAGTTCCGTTTCTACCTG 3'<br>R: 5' CTTAGCCACTCCTTCTGT 3'      |
| Fibronectin   | F:5' TCGCTTTGACTTCACCAC 3'<br>R:5' CTTCTCGCTCAGTTCGT 3'         |

Mice:

Table S2 | Primers used for the quantitative real-time PCR.

|               |                                                                    |
|---------------|--------------------------------------------------------------------|
| TNF- $\alpha$ | F:5' CAGGCGGTGCCTATGTCTC 3'<br>R:5' CGATCACCCCGAAGTTCAGTAG 3'      |
| IL-1 $\beta$  | F:5' GAAATGCCACCTTTTGACAGTG 3'<br>R:5' TGGATGCTCTCATCAGGACAG 3'    |
| OCLN          | F: 5' TGAAAGTCCACCTCCTTACAGA 3'<br>R: 5' CCGGATAAAAAGAGTACGCTGG 3' |
| ZO-1          | F: 5' GAGCGGGCTACCTTACTGAAC 3'<br>R: 5' GTCATCTCTTTCCGAGGCATTAG 3' |
| MMP2          | F: 5' ACCTGAACACTTTCTATGGCTG 3'<br>R: 5' CTTCCGCATGGTCTCGATG 3'    |
| MMP9          | F: 5' GCAGAGGCATACTTGTACCG 3'<br>R: 5' TGATGTTATGATGGTCCCCTTG 3'   |
| CXCL12        | F: 5' TGCATCAGTGACGGTAAACCA 3'<br>R: 5' CACAGTTTGGAGTGTTGAGGAT 3'  |
| TLR4          | F: 5' GCCTTTCAGGGAATTAAGCTCC 3'<br>R: 5' GATCAACCGATGGACGTGTAAA 3' |
| IL-6          | F: 5' CTGCAAGAGACTTCCATCCAG 3'<br>R: 5' AGTGGTATAGACAGGTCTGTTGG 3' |
| DSV           | F:5'AGTTTGATCMTGGCTCAG3'<br>R:5'GGTTACCTTGTTACGACTT3'              |
